# Supplementary material for: Fine-Tuning Bidirectional Encoder Representations From Transformers (BERT)–Based Models on Large-Scale Electronic Health Record Notes: An Empirical Study
Source: PubMed Central journal article supplement (PMC6746103; doi:10.2196/14830), 2019-09-12
Supplement: medinform_v7i3e14830_app1.pdf [file medinform_v7i3e14830_app1.pdf]

## Appendix 1: Full Results on 3 Corpora of Entity Normalization

Table 1. Results of entity normalization. Models are ranked from low to high based on F1s. “gold entities” and “predicted entities” mean we used gold entity mentions and MetaMap-predicted entity mentions as input.

| Corpus                       | Model                   | Precision | Recall | F1    |
|------------------------------|-------------------------|-----------|--------|-------|
| MADE<br>(gold entities)      | BERT                    | 67.87     | 67.87  | 67.87 |
|                              | BioBERT                 | 68.22     | 68.22  | 68.22 |
|                              | EhrBERT <sub>500K</sub> | 68.74     | 68.74  | 68.74 |
|                              | EhrBERT <sub>1M</sub>   | 68.82     | 68.82  | 68.82 |
| MADE<br>(predicted entities) | MetaMap [1]             | 34.24     | 44.22  | 38.59 |
|                              | BERT                    | 36.16     | 46.84  | 40.81 |
|                              | BioBERT                 | 36.21     | 46.90  | 40.87 |
|                              | EhrBERT <sub>500K</sub> | 36.28     | 46.99  | 40.95 |
|                              | EhrBERT <sub>1M</sub>   | 36.28     | 46.99  | 40.95 |
| NCBI                         | DNorm [2]               | 90.67     | 88.67  | 88.37 |
|                              | BERT                    | 88.63     | 91.23  | 89.43 |
|                              | EhrBERT <sub>500K</sub> | 89.30     | 91.69  | 90.00 |
|                              | EhrBERT <sub>1M</sub>   | 89.77     | 91.90  | 90.35 |
|                              | BioBERT                 | 90.07     | 92.27  | 90.71 |
| CDR                          | DNorm [2]               | 91.34     | 89.71  | 89.92 |
|                              | BERT                    | 92.59     | 94.08  | 93.11 |
|                              | BioBERT                 | 93.06     | 94.21  | 93.42 |
|                              | EhrBERT <sub>500K</sub> | 93.06     | 94.26  | 93.45 |
|                              | EhrBERT <sub>1M</sub>   | 93.44     | 94.64  | 93.82 |

### References

1. Aronson AR, Lang F-M. An overview of MetaMap: historical perspective and recent advances. *J Am Med Inform Assoc* 2010;17(3):229–236.
2. Leaman R, Islamaj Dogan R, Lu Z. DNorm: disease name normalization with pairwise learning to rank. *Bioinforma Oxf Engl* 2013 Nov 15;29(22):2909–2917. PMID:23969135
